# Supplementary material for: Ape parasite origins of human malaria virulence genes
Source: PubMed Central journal article supplement (PMC4633637; doi:10.1038/ncomms9368), 2015-10-12
Supplement: ncomms9368-s1.pdf [file ncomms9368-s1.pdf]

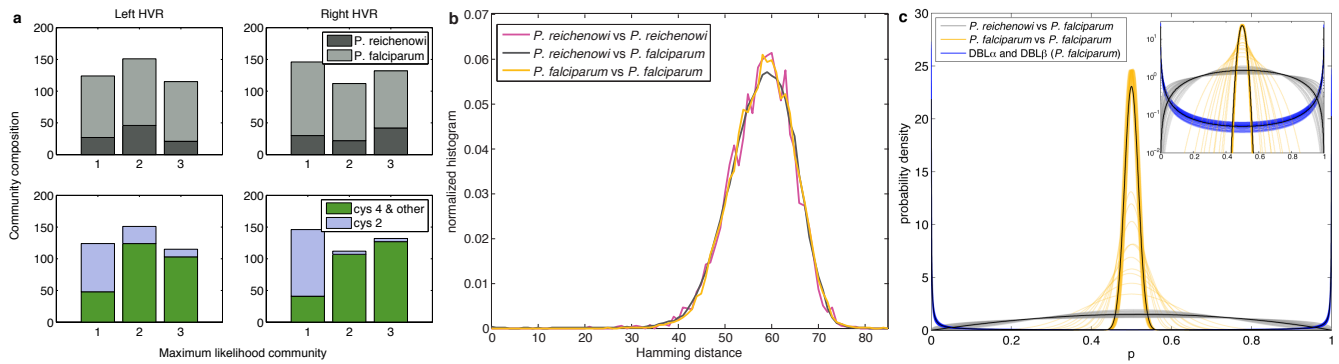

**Supplementary Figure 1: Additional analyses of *P. falciparum*-*P. reichenowi* var tag sequences.** DBL $\alpha$  tags of *P. falciparum* and *P. reichenowi* var genes are indistinguishable using network and pair-wise distance analyses, and highly overlapping using a Bayesian *k*-mer analysis. **(a)** Bars show the composition of *P. falciparum*-*P. reichenowi* network (Fig. 2) community structures by species (top row) and by cysteine count classification (bottom row). **(b)** Normalized histograms of pair-wise Hamming distances (number of aligned positions at which two sequences differ) between var tags are shown, with colors corresponding to the *Plasmodium* species compared as indicated. **(c)** Probability density of posterior distributions of *k*-mer sharing parameter *p* (Methods). Each set of lines shows 100 distributions using independently estimated maximum likelihood parameters; black lines indicate distributions using corresponding averages of maximum likelihood parameters. Inset shows identical data on a log axis. Distributions peaked at *p*=0.5 indicate maximally overlapping *k*-mers; distributions peaked at 0 and 1 indicate minimally overlapping *k*-mers. Representative plot with *k*=7 shown.

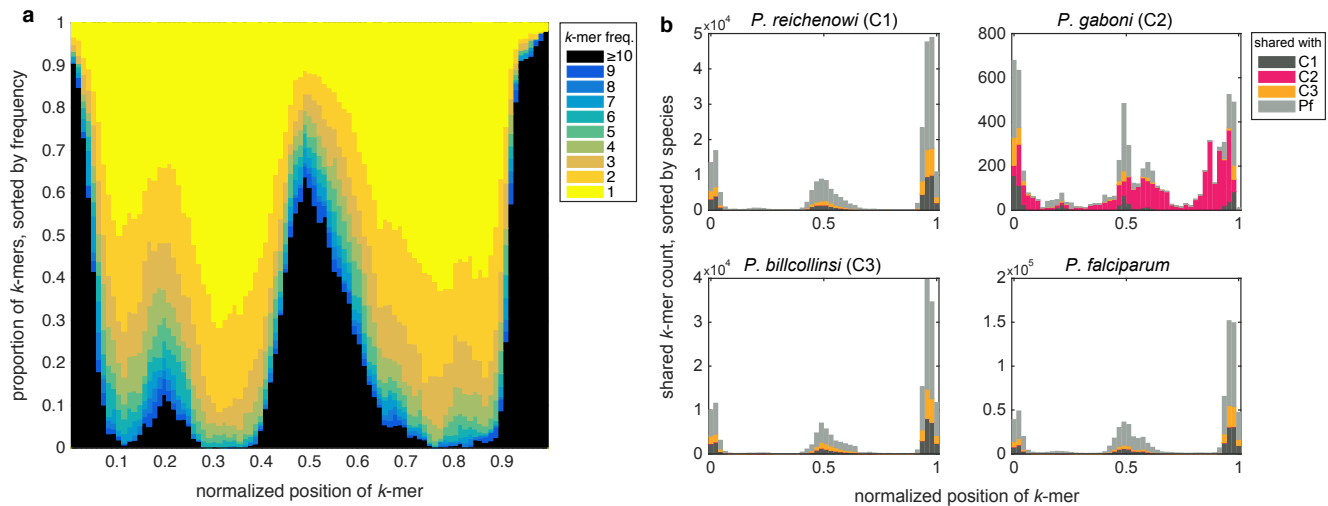

**Supplementary Figure 2: *k*-mer frequency and *k*-mer inter-species sharing in *Laverania* var gene sequences.** Data shown represent all sequences from all *Laverania* single-species samples with *k*=7. Horizontal axes correspond to starting position of a *k*-mer and vertical axes correspond to stacked proportions (subplot a) or absolute numbers (subplot b) of *k*-mers, sorted as follows. **(a)** Proportions of *k*-mers sorted and colored by observed frequency in all tag sequences. Observed frequency of one (bright yellow) indicates a unique *k*-mer; All frequencies greater than 10 are binned together as black; other colors as indicated in legend. **(b)** Counts of *k*-mers in each of four species, sorted and colored by aggregate counts in tags from other species.

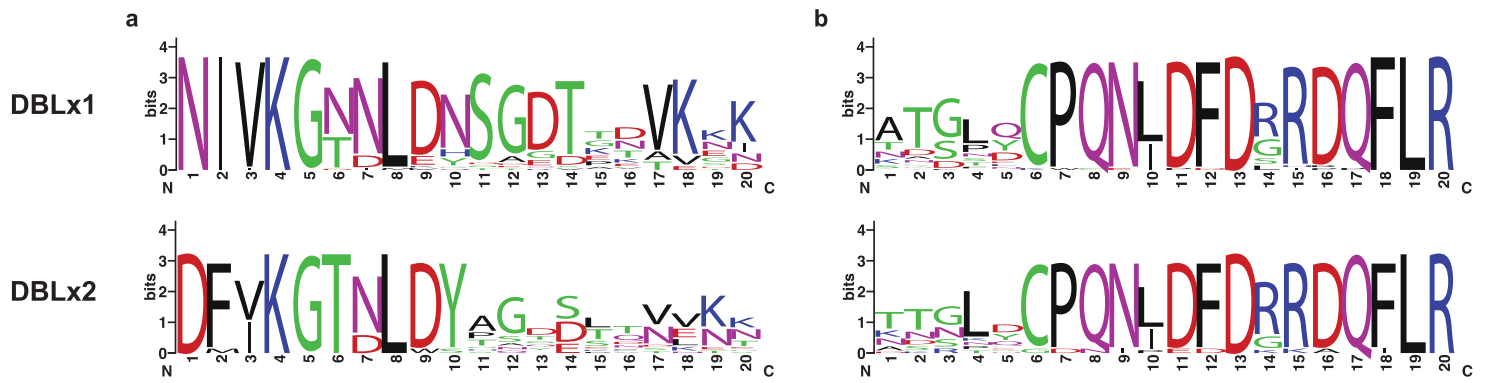

**Supplementary Figure 3: Sequence motifs within conserved regions of DBLx tag sequences.** DBLx tags may be divided into two potential sub-groups, based on differences in residues at the N-terminus. **(a)** The first 20 residues of the N-terminus of the tag sequences. **(b)** The last 20 residues of the C-terminus of the tag sequences.



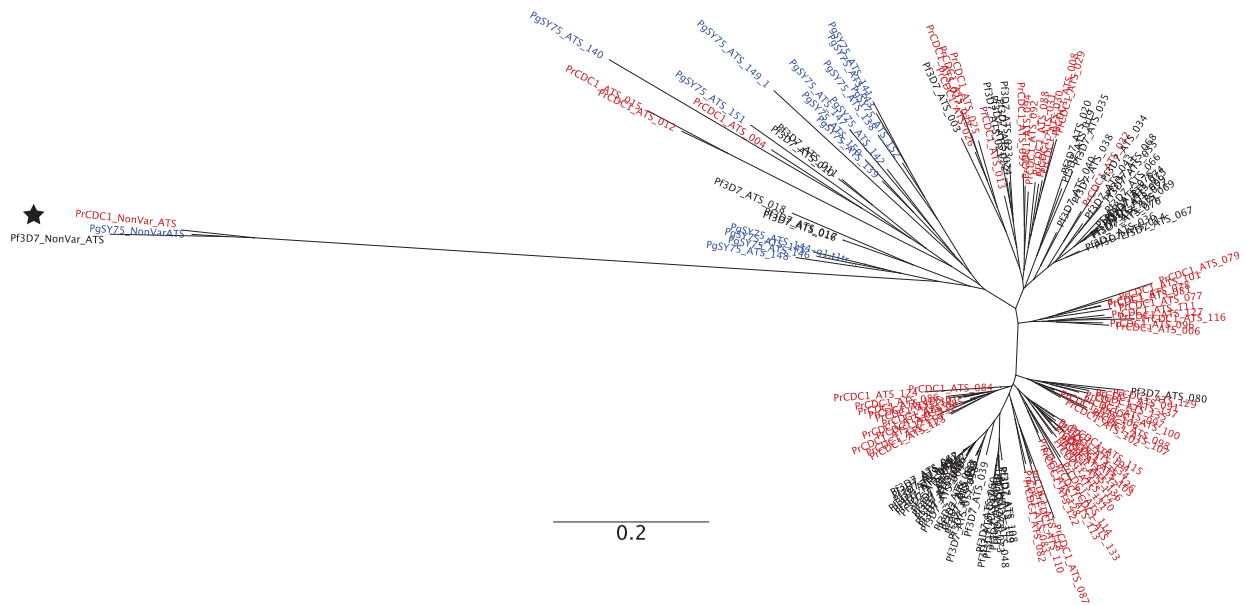

**Supplementary Figure 5: Neighbor joining tree of ATS and ATS-like amino acid sequences.** ATS domains are from *P. falciparum* parasite 3D7, *P. reichenowi* parasite PrCDC, and *P. gaboni* parasite SYptt75. Included are *var* and *var*-like genes as well as the *P. falciparum* PF3D7\_0113800 gene and its *P. reichenowi* and *P. gaboni* orthologues previously reported to contain ATS-like sequences<sup>1</sup>. Tip labels are colored by species with *P. falciparum*, *P. reichenowi*, and *P. gaboni* shown in black, red, and blue, respectively. The star denotes ATS-like sequences from *P. falciparum*, *P. reichenowi*, and *P. gaboni* orthologs of PF3D7\_0113800. Due to ATS-like domain diversity, only the more conserved N-terminal region, corresponding to HB41 and HB43 of the *P. falciparum* *var*-ATS domain (see Figure 5), was used in the alignment. *Var* and *var*-like ATS sequences that did not span this entire region were excluded from the analysis. This tree summarizes patterns of protein similarity and is not a depiction of evolutionary history.

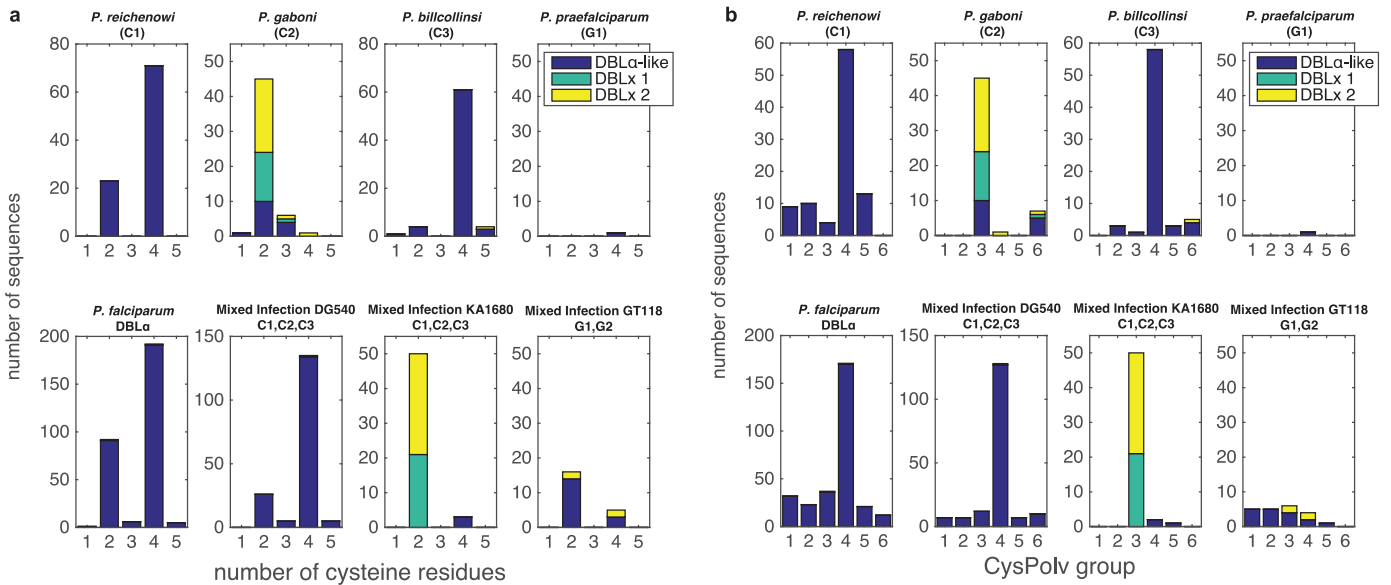

**Supplementary Figure 6: Repertoire structure of *Laverania* var tag sequences by cysteine counts and CysPolv (CP) groups.** Histograms show (a) the number of cysteine residues in each tag sequence, and (b) CP groups<sup>2</sup> for tag sequences, sorted by sample. Repertoires appear stably structured for *P. falciparum*, *P. reichenowi*, and *P. billcollinsi*. Data for other species and samples are too few to draw conclusions but are shown. DBL $\alpha$ -like, DBLx1, and DBLx2 tags are colored as indicated in legend.

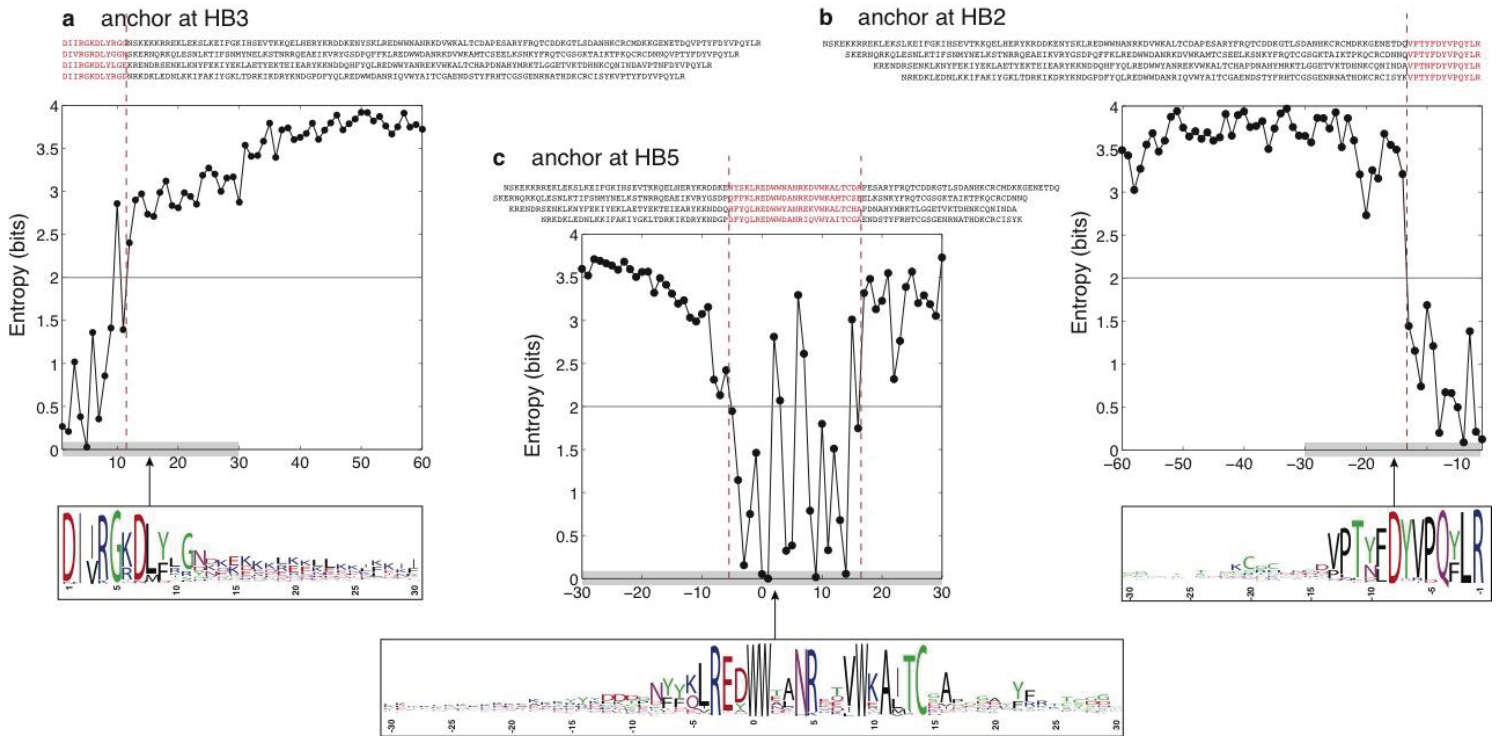

**Supplementary Figure 7: Identification of Highly Variable Regions (HVRs) in DBL tag sequences.** Left and Right HVRs were determined by “anchoring” or aligning sequences to a homology block (HB), calculating sequence entropy, and removing conserved sequence content (see Methods). This process is repeated for (a) HB3, (b) HB2, and (c) HB5. In each panel, four sample sequences are anchored to elucidate this process: black text indicates retained sequence content; red text indicates removed content. Red dashed line(s) corresponds to position(s) of cutoff, as identified from plot of sequence entropy. Sequence entropy plots were generated from all *Laverania* data. Corresponding sequence “logo” plots are shown for the 30 residues adjacent to each anchor point, corresponding to shaded regions in plots.

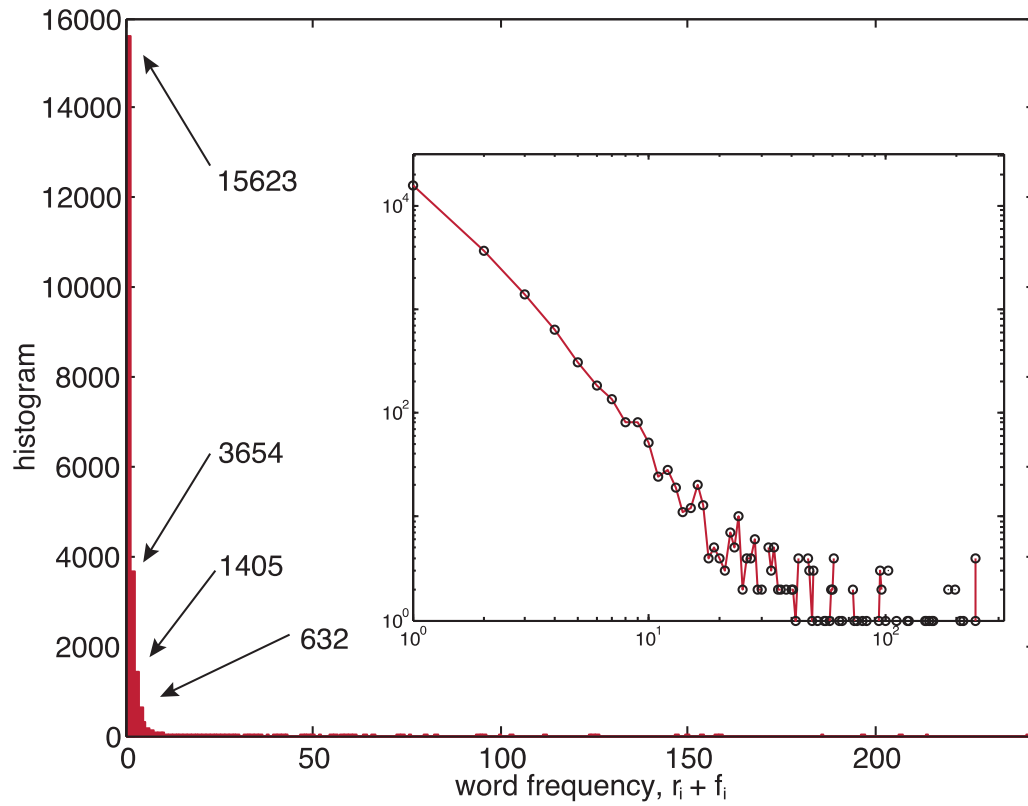

**Supplementary Figure 8: Histogram of word frequencies in *P. falciparum* and *P. reichenowi* sequences.** Word (or  $k$ -mer) frequencies, (calculated as described in Methods,  $r_i + f_i$ ) shows that most words are unique, i.e.  $r_i + f_i = 1$ . Numerical labels with arrows indicate bar heights for the first four bars. Inset shows identical data on log-log axes to highlight the breadth of the distribution. While this plot shows  $k = 7$ , plots for other values of  $k$  show similarly broad distributions.

Supplementary Table 1. *Laverania* species composition in ape samples

| Sample code <sup>a</sup> | Country <sup>b</sup> | Collection Date (mm/dd/yy) | Sample | <i>cytB</i> <sup>c</sup> |                          | <i>eba165</i> <sup>c</sup> |                      | <i>eba175</i> <sup>c</sup> |                        | <i>p47</i> <sup>c</sup> |                      | <i>p48/45</i> <sup>c</sup> |                      | <i>ldh</i> <sup>c</sup> |                      | <i>RH5</i> <sup>c</sup> |                      | <i>clpC</i> <sup>c</sup> |                         | Species composition <sup>d</sup>  |        |
|--------------------------|----------------------|----------------------------|--------|--------------------------|--------------------------|----------------------------|----------------------|----------------------------|------------------------|-------------------------|----------------------|----------------------------|----------------------|-------------------------|----------------------|-------------------------|----------------------|--------------------------|-------------------------|-----------------------------------|--------|
|                          |                      |                            |        | SGS (hap) <sup>d</sup>   | species <sup>e</sup>     | SGS (hap) <sup>d</sup>     | species <sup>e</sup> | SGS (hap) <sup>d</sup>     | species <sup>e</sup>   | SGS (hap) <sup>d</sup>  | species <sup>e</sup> | SGS (hap) <sup>d</sup>     | species <sup>e</sup> | SGS (hap) <sup>d</sup>  | species <sup>e</sup> | SGS (hap) <sup>d</sup>  | species <sup>e</sup> | SGS (hap) <sup>d</sup>   | species <sup>e</sup>    | (# of total SGS amplicons)        |        |
| SYpt115                  | Cameroon             | 7/11/12                    | Blood  | 11 (1)                   | C1 (11)                  | N/A                        | N/A                  | N/A                        | N/A                    | 7 (1)                   | C1 (7)               | N/A                        | N/A                  | 12 (1)                  | C1 (12)              | 4 (1)                   | C1 (4)               | 12 (1)                   | C1 (12)                 | C1 (46)                           |        |
| SYpt15                   | Cameroon             | 5/7/11                     | Blood  | 5 (1)                    | C2 (5)                   | 8 (1)                      | C2 (8)               | 5 (1)                      | C2 (5)                 | 10 (2)                  | C2 (10)              | 8 (1)                      | C2 (8)               | 37 (2)                  | C2 (37)              | 2 (1)                   | C2 (2)               | 11 (1)                   | C2 (11)                 | C2 (86)                           |        |
| SYpte37                  | Cameroon             | 8/3/12                     | Blood  | 8 (1)                    | C2 (8)                   | 3 (1)                      | C2 (3)               | 6 (1)                      | C2 (6)                 | 5 (2)                   | C2 (5)               | 4 (1)                      | C2 (4)               | 27 (1)                  | C2 (27)              | 3 (1)                   | C2 (3)               | 3 (1)                    | C2 (3)                  | C2 (59)                           |        |
| SYpt175                  | Cameroon             | 10/17/13                   | Blood  | 15 (3)                   | C2 (15)                  | 5 (1)                      | C2 (5)               | 3 (2)                      | C2 (3)                 | 53 (4)                  | C2 (53)              | 8 (2)                      | C2 (8)               | 29 (4)                  | C2 (29)              | N/A                     | N/A                  | 9 (1)                    | C2 (9)                  | C2 (122)                          |        |
| SYpt82                   | Cameroon             | 10/28/13                   | Blood  | 12 (1)                   | C2 (12)                  | 8 (1)                      | C2 (8)               | 8 (1)                      | C2 (8)                 | 7 (1)                   | C2 (7)               | 2 (1)                      | C2 (2)               | 20 (1)                  | C2 (20)              | N/A                     | N/A                  | 2 (1)                    | C2 (2)                  | C2 (59)                           |        |
| SYpt20                   | Cameroon             | 2/2/12                     | Blood  | 4 (1)                    | C3 (4)                   | 42 (2)                     | C3 (42)              | 6 (1)                      | C3 (6)                 | 7 (1)                   | C3 (7)               | 8 (1)                      | C3 (8)               | 23 (1)                  | C3 (23)              | 73 (2)                  | C3 (73)              | 11 (1)                   | C3 (11)                 | C3 (174)                          |        |
| SYpt79                   | Cameroon             | 8/27/13                    | Blood  | 1 (1)                    | C3 (1)                   | 6 (2)                      | C3 (6)               | 4 (1)                      | C3 (4)                 | 1 (1)                   | C3 (1)               | 2 (1)                      | C3 (2)               | 2 (2)                   | C3 (2)               | N/A                     | N/A                  | N/A                      | N/A                     | C3 (16)                           |        |
| GT999140                 | RC                   | 4/12/08                    | Faeces | 2 (2)                    | G1 (2)                   | N/A                        | N/A                  | N/A                        | N/A                    | N/A                     | N/A                  | N/A                        | N/A                  | N/A                     | N/A                  | N/A                     | N/A                  | N/A                      | N/A                     | N/A                               | G1 (2) |
| GT999118                 | RC                   | 10/24/03                   | Faeces | 42 (6)                   | G1 (40), G2 (2)          | 1 (1)                      | G1 (1)               | 7 (5)                      | G1 (5), G2 (2)         | 2 (1)                   | G1 (2)               | 1 (1)                      | G1 (1)               | 2 (2)                   | G1 (2)               | 1 (1)                   | G1 (1)               | 1 (1)                    | G1 (1)                  | G1 (53), G2 (4)                   |        |
| DGptt540                 | Cameroon             | 9/3/04                     | Faeces | 21 (9)                   | C1 (12), C3 (8), Unk (1) | 6 (3)                      | C1 (6)               | 14 (5)                     | C1 (10), C3 (4)        | 10 (4)                  | C1 (10)              | 4 (3)                      | C1 (3), C3 (1)       | 2 (2)                   | C1 (2)               | 9 (4)                   | C1 (9)               | 8 (6)                    | C2 (5), C3 (2), Unk (1) | C1 (52), C2 (5), C3 (15), Unk (2) |        |
| KApts1680                | DRC                  | 3/9/07                     | Faeces | 32 (8)                   | C1 (1), C2 (31)          | 17 (5)                     | C2 (17)              | 10 (7)                     | C1 (2), C2 (8), C3 (2) | 34 (5)                  | C2 (34)              | 3 (2)                      | C2 (3)               | 6 (4)                   | C2 (6)               | 9 (1)                   | C2 (9)               | 3 (3)                    | C2 (2), C3 (1)          | C1 (3), C2 (108), C3 (3)          |        |

<sup>a</sup>Blood samples were collected opportunistically from individually known chimpanzees housed at a Wildlife Rescue Center (SY). Faecal samples were collected from wild-living apes, with their species and subspecies origin determined by mitochondrial DNA analysis (*ptt*, *P. t. troglodytes*; *pte*, *P. t. ellioti*; *pts*, *P. t. schweinfurthii*; *ggg*, *G. g. gorilla*); a two-letter code indicates the sample's field site of origin.

<sup>b</sup>RC, Republic of the Congo; DRC, Democratic Republic of the Congo.

<sup>c</sup>PCR amplified loci in the *Plasmodium* mitochondrial (*cytB*), nuclear (*eba165*, *eba175*, *p47*, *p48/45*, *ldh*, *RH5*) and apicoplast (*clpC*) genomes: *cytB*, cytochrome B; *eba165* and *eba175*, erythrocyte binding antigens EBA165 and EBA175; *p47* and *p48/45*, *Plasmodium* 6-cysteine proteins P47 and P48/45; *ldh*, lactate dehydrogenase; *RH5*, reticulocyte-binding protein homolog 5; *clpC*, caseinolytic protease C.

<sup>d</sup>SGS, number of single genome derived sequences; brackets indicate the number of distinguishable haplotypes (hap). N/A, not available.

<sup>e</sup>Ape *Laverania* species present in sample: C1, *P. reichenowi*; C2, *P. gaboni*; C3, *P. billicollini*; G1, *P. praefalciparum*; G2, *P. alderi*; G3, *P. blacklocki*; Unk, unknown non-*Laverania* species. Brackets indicate the number of independent SGS derived sequences for that ape *Laverania* species.



**Supplementary Table 2. Amplification of *var* DBL domains from ape samples**

| Sample code <sup>a</sup> | Species composition <sup>b</sup> | <i>var</i> DBL haplotypes <sup>c</sup> | First round primers                 | Second round primers             | GenBank Accession No. |
|--------------------------|----------------------------------|----------------------------------------|-------------------------------------|----------------------------------|-----------------------|
| SYptt15                  | C1                               | 7                                      | upsA750/BetaR                       | DBL $\alpha$ AF'/DBL $\alpha$ BR | KJ801976-KJ801982     |
|                          |                                  | 30                                     | C1DBL $\alpha$ AF/C1DBL $\alpha$ BR | N/A                              | KJ801983-KJ802011     |
| SYptt5                   | C2                               | 5                                      | DBL $\alpha$ -5'/DBL $\alpha$ -3'   | N/A                              | KP167365-KP167369     |
| SYpte37                  | C2                               | 15                                     | C2DBLAF/C2DBLAR                     | N/A                              | KP167410-KP167424     |
| SYptt75                  | C2                               | 15                                     | DBL $\alpha$ -5'/DBL $\alpha$ -3'   | N/A                              | KP167425-KP167439     |
| SYptt82                  | C2                               | 1                                      | DBL $\alpha$ -5'/DBL $\alpha$ -3'   | N/A                              | KP167471              |
|                          |                                  | 1                                      | C2DBLAF/C2DBLAR                     | NA                               | KP167470              |
| SYptt20                  | C3                               | 31                                     | DBL $\alpha$ -5'/DBL $\alpha$ -3'   | N/A                              | KP167370-KP167409     |
|                          |                                  | 9                                      | C2DBLAF/C2DBLAR                     | N/A                              |                       |
| SYptt79                  | C3                               | 30                                     | DBL $\alpha$ -5'/DBL $\alpha$ -3'   | N/A                              | KP167440-KP167469     |
| GTggg140                 | G1                               | 1                                      | DBL $\alpha$ -5'/DBL $\alpha$ -3'   | N/A                              | KP167332              |
| GTggg118                 | G1, G2                           | 21                                     | DBL $\alpha$ -5'/DBL $\alpha$ -3'   | N/A                              | KP167311-KP167331     |
|                          |                                  | 162                                    | DBL $\alpha$ -5'/DBL $\alpha$ -3'   | N/A                              |                       |
| DGptt540                 | C1-3, Unk                        | 2                                      | upsA750/BetaR                       | DBL $\alpha$ AF'/DBL $\alpha$ BR |                       |
|                          |                                  | 3                                      | upsB/BetaR                          | DBL $\alpha$ AF'/DBL $\alpha$ BR | KP167140-KP167310     |
|                          |                                  | 1                                      | upsA750/DBL $\alpha$ BR             | DBL $\alpha$ AF'/PTYF3           |                       |
|                          |                                  | 3                                      | upsB/DBL $\alpha$ BR                | DBL $\alpha$ AF'/PTYF3           |                       |
| KApts1680                | C1-3                             | 32                                     | DBL $\alpha$ -5'/DBL $\alpha$ -3'   | N/A                              | KP167333-KP167364     |

<sup>a</sup>Blood samples were collected opportunistically from individually known chimpanzees housed at a Wildlife Rescue Center (SY). Fecal samples were collected from wild-living apes, with their species and subspecies origin determined by mitochondrial DNA analysis (*ptt*, *P. t. troglodytes*; *pte*, *P. t. ellioti*; *pts*, *P. t. schweinfurthii*; *ggg*, *G. g. gorilla*); a two-letter code indicates the sample's field site of origin<sup>3</sup>.

<sup>b</sup>Ape *Laverania* species composition as determined in Supplementary Table 1: C1, *P. reichenowi*; C2, *P. gaboni*; C3, *P. billcollinsi*; G1, *P. praefalciparum*; G2, *P. alderi*; G3, *P. blacklocki*; Unk, unknown non-*Laverania* species.

<sup>c</sup>*var* DBL domains were amplified using single or nested PCR, cloned into a plasmid vector (pGEM-T Easy), sequenced, and grouped into different haplotypes using phylogenetic analysis (Methods). For each sample, only unique haplotypes were analyzed.

Supplementary Table 3. List of non-var DBL domains included in Figure 3.

| Group        | Isolate                                                           | Header                                                                                                                | Sequence                                                                                   |
|--------------|-------------------------------------------------------------------|-----------------------------------------------------------------------------------------------------------------------|--------------------------------------------------------------------------------------------|
| P. vivax DBP | DQ156518                                                          | > c DQ156518.1_cdsid_AA281531.1.1 [protein=duffy binding protein]                                                     | LGDFGDIIMGTDMEGIGYSKVVENLRSIFGTGKNAQQRRKQWNE SKAQIWTAMMYSVKRRLKGNFIWICKINVAVNI EPQIYR      |
|              | AF289482                                                          | > c AF289482.1_cdsid_AAG30849.1.1 [protein=duffy binding protein]                                                     | LGDFGDIIMGTDMEGIGYSKVVENLRSIFGTGKNAQQRRKQWNE SKAQIWTAMMYSVKRRLKGNFIWICKINVAVNI EPQIYR      |
|              | DQ156512 (Sal I)                                                  | > c DQ156512.1_cdsid_AA281525.1.1 [protein=duffy binding protein]                                                     | LGDFGDIIMGTDMEGIGYSKVVENLRSIFGTGKNAQQRRKQWNE SKAQIWTAMMYSVKRRLKGNFIWICKINVAVNI EPQIYR      |
|              | DQ156513                                                          | > c DQ156513.1_cdsid_AA281526.1.1 [protein=duffy binding protein]                                                     | LGDFGDIIMGTDMEGIGYSKVVENLRSIFGTGKNAQQRRKQWNE SKAQIWTAMMYSVKRRLKGNFIWICKINVAVNI EPQIYR      |
|              | EJ395591                                                          | > c EJ395591.1_cdsid_ACB42429.1.1 [gene=DBP] [protein=duffy binding protein]                                          | LGDFGDIIMGTDMEGIGYSKVVENLRSIFGTGKNAQQRRKQWNE SKAQIWTAMMYSVKRRLKGNFIWICKINVAVNI EPQIYR      |
|              | EU812894                                                          | > c EU812894.1_cdsid_AJ1724.1.1 [gene=dbp] [protein=Duffy binding protein]                                            | LGDFGDIIMGTDMEGIGYSKVVENLRSIFGTGKNAQQRRKQWNE SKAQIWTAMMYSVKRRLKGNFIWICKINVAVNI EPQIYR      |
|              | EU860428                                                          | > c EU860428.1_cdsid_AJ54187.1.1 [protein=duffy binding surface protein region II]                                    | LGDFGDIIMGTDMEGIGYSKVVENLRSIFGTGKNAQQRRKQWNE SKAQIWTAMMYSVKRRLKGNFIWICKINVAVNI EPQIYR      |
|              | FJ491215                                                          | > c FJ491215.1_cdsid_ACN69945.1.1 [gene=DBP-II] [protein=duffy binding surface protein region II]                     | LGDFGDIIMGTDMEGIGYSKVVENLRSIFGTGKNAQQRRKQWNE SKAQIWTAMMYSVKRRLKGNFIWICKINVAVNI EPQIYR      |
|              | GU143917                                                          | > c GU143917.1_cdsid_ACY91987.1.1 [protein=Duffy binding protein]                                                     | LGDFGDIIMGTDMEGIGYSKVVENLRSIFGTGKNAQQRRKQWNE SKAQIWTAMMYSVKRRLKGNFIWICKINVAVNI EPQIYR      |
| JN255576     | > c JN255576.1_cdsid_AFD18594.1.1 [protein=duffy-binding protein] | LGDFGDIIMGTDMEGIGYSKVVENLRSIFGTGKNAQQRRKQWNE SKAQIWTAMMYSVKRRLKGNFIWICKINVAVNI EPQIYR                                 |                                                                                            |
| EBA-175      | 3D7                                                               | >PF3D7_0731500_DBLtag1   Plasmodium falciparum 3D7   erythrocyte binding antigen-175 (EBA175)   protein   length=1502 | FLDYGLAMGNMDFGGYSTAENIQEVFKGARGHISEHKIKMFRKRWNEFREKLEAMLSERKNNINCKNI PQEELQITQ             |
|              | IT                                                                | >PFIT_0730400_DBLtag1   Plasmodium falciparum IT   erythrocyte binding antigen-175   protein   length=1502            | FADIRDIIGTDDYNDLNRKLVGRINTNSNYVHRNKQNDKLFDEWVVKIKDWNVVISVFKDKTVCCKEDIENI PQFFR             |
|              | PrCDC                                                             | >PrCDC1_EBA175 tag1                                                                                                   | FLDYGLAMGNMDFGGYSTAENIQEVFKGARGHISEHKIKMFRKRWNEFREKLEAMLSERKNNINCKNI PQEELQITQ             |
| EBA-165      | 3D7                                                               | >PF3D7_0424300_DBLtag1   Plasmodium falciparum 3D7   erythrocyte binding antigen-165                                  | YDYGDIIKGTDMELGRLSIVKVEFIDRIIFRDNKSAENRKKWWEIISTHINWAMIKERKKEPFKDEKADKPLDEPQINR            |
|              | IT                                                                | >PFIT_0422500_DBLtag1   Plasmodium falciparum IT   erythrocyte binding antigen-165                                    | FDDYKNIILGKDMWRDPSIKTENILKGNFEGIKANIVSMYPSADLSLDFRKHWWQNKQLEWAIISCFYKGNHTGVCLEMDNDNQYLRWFR |
|              | PrCDC                                                             | >PrCDC EBA165 tag1                                                                                                    | YDYGDIIKGTDMELGRLSIVKVEFIDRIIFRDNKSAENRKKWWEIISTHINWAMIKERKKEPFKDEKADKPLDEPQINR            |
| EBA-140      | 3D7                                                               | >PF3D7_1301600_DBLtag1   Plasmodium falciparum 3D7   erythrocyte binding antigen-140 (EBA140)   protein   length=1210 | FSDFRSFIIGDMDFGGNTDRVGYINMKFSYDYKKNVEKLNIRKWEKKNANLNHNIWVHKQNI SEKCAIIPAEPEQINL            |
|              | IT                                                                | >PFIT_1300800_DBLtag1   Plasmodium falciparum IT   erythrocyte binding antigen-140   protein   length=1210            | YADLADI IKGSDI I KDYGRKMEENLNKVNKDKRNEE SLKI FRKWWDENKENVWMSAVLNKNETCKDYDKFQIPQFLR         |
|              | PrCDC                                                             | >PrCDC EBA140 tag1                                                                                                    | FSDFRSFIIGDMDFGGNTDRVGYINMKFSYDYKKNVEKLNIRKWEKKNANLNHNIWVHKQNI SEKCAIIPAEPEQINL            |
| EBA-181      | IT                                                                | >PFIT_0101000_DBLtag1   Plasmodium falciparum IT   erythrocyte binding antigen-181   protein   length=1575            | YLDYKDVIFGTDLDRNNISKLVEESLKRFFKSSVLPANRRYGTRELKMTIQPYARLGRKCRKDENEPQINR                    |
|              | 3D7                                                               | >PF3D7_0102500_DBLtag1   Plasmodium falciparum 3D7   erythrocyte binding antigen-181 (EBA181)   protein   length=1567 | YLDYKDVIFGTDLDRNNISKLVEESLKRFFKSSVLPANRRYGTRELKMTIQPYARLGRKCRKDENEPQINR                    |
|              | PrCDC                                                             | >PrCDC EBA181 DBLtag1                                                                                                 | YLDYKDVIFGTDLDRNNISKLVEESLKRFFKSSVLPANRRYGTRELKMTIRPYEHLGKCKKDEGEFQINR                     |

|                                 |       |                                                                                                                           |                                                                                                 |
|---------------------------------|-------|---------------------------------------------------------------------------------------------------------------------------|-------------------------------------------------------------------------------------------------|
|                                 |       | >PRCDC_EBA181_DBLtag2                                                                                                     | VADYKDIIVIGTDLWDDKNSIKAAQNLNATIFERNFGYVGRNLFKTIKDLRTVWVILNDRNIMESMCCGIIIDVDRRGVSCVRMNELENMPQFFR |
| EBL-1                           | 3D7   | >PF3D7_1371600_DBLtag1   Plasmodium falciparum 3D7   erythrocyte binding like protein 1                                   | FLDYGDI IIGRDLIYKNTDYIKEQFKI FNNFYNNLELDELNDELNDEKNIKLRKEWKEKEDIWEEMTKHEHDFIEKCKYFAKDEPQIVR     |
|                                 |       | >PF3D7_1371600_DBLtag2   Plasmodium falciparum 3D7   erythrocyte binding like protein 1                                   | VADIGDIVRGLDWRDINTNKLSEKFKI PMGGGNSRFKQNDNERNKWEKQMLIWSMVVHI FKGTCKRHNNFEKIPQFLR                |
|                                 | IT    | >PFIT_0731900_DBLtag1   Plasmodium falciparum IT   erythrocyte binding like protein 1                                     | FLDYGDI IIGRDLIYKNTDYIKEQFKI FNNFYNNLELDELNDELNDEKNIKLRKEWKEKEDIWEEMTKHEHDFIEKCKYFAKDEPQIVR     |
| <i>P. falciparum</i><br>DBLMSP  |       | >PFIT_0731900_DBLtag2   Plasmodium falciparum IT   erythrocyte binding like protein 1                                     | VADIGDIVRGLDWRDINTNKLSEKFKI PMGGGNSRFKQNDNERNKWEKQMLIWSMVVHI FKGTCKRHNNFEKIPQFLR                |
|                                 | 3D7   | >PF3D7_1035700   Plasmodium falciparum 3D7   duffy binding-like merozoite surface protein (DBLMSP)   protein   length=697 | FSDMGDI IKGTDLIDYQITKINRALDKILRNKTSNDKIKRVDWWEAKSAFWDAFMCQYKVIHIGNKFCPEHNDMDRI PQYLR            |
|                                 | IT    | >PFIT_1035100   Plasmodium falciparum IT   duffy binding-like merozoite surface protein   protein   length=697            | FSDMGDI IKGTDLIDYQITKINRALDKILGNKTSNAEIKNRVDWWEAKRSELDAIMCQYKVIHIGNKFCPEHNDMDRI PQYLR           |
| <i>P. falciparum</i><br>DBLMSP2 | PrCDC | >PRCDC_1035000   Plasmodium reichenowi PrCDC   duffy binding-like merozoite surface protein MSP3.4 MSPDBL1                | FSDMGDI IKGTDLIDYQITKINRALDKILGNKTSNAEIKNRVDWWEAKRSELDAIMCQYKVIHIGNKFCPEHNDMDRI PQYLR           |
|                                 | 3D7   | >PF3D7_1036300   Plasmodium falciparum 3D7   merozoite surface protein (DBLMSP2)   protein   length=762                   | FADIGNI IRGDDMDTPTSKEITITYLEKVLK IYNEKNDKFKDAKRWTEKRNHRVWEAMMCGYSAQKDNQCTGYGNI DDIPQFLR         |
|                                 | IT    | >PFIT_1035500   Plasmodium falciparum IT   merozoite surface protein (MSP3.8)   protein   length=767                      | FADIGNI VQGNMIDTPTSNTKTYLEEVLGKRYKVNDFKAKTWI QNKRHVWDAAMCGYKREKDKCTGYGNI DDIPQFLR               |
|                                 | PrCDC | >PRCDC_1035400   Plasmodium reichenowi PrCDC   merozoite surface protein PSEUDOGENE MSP3.8 MSPDBL2                        | FADIGNI IRGDDI LDTPSNTKTYLEEVLELKNKDEAKDAKRWTEKRNHRVWEAMMCGYKREKDKCTGYGNI DDIPQFLR              |

**Supplementary Table 4. List of PCR primers used for *Laverania* species identification.**

| gene                       | 1st Round PCR                                 | 2nd Round PCR                               |
|----------------------------|-----------------------------------------------|---------------------------------------------|
| <b>eba165</b>              | PfrEBA165F3: 5'-ATGTAATGAGAAAGACCTTGAAGTTG-3' | PfrEBA165F4: 5'-CTCTGGGTTTCCTCTTTTCTTCTA-3' |
|                            | PfrEBA165R24: 5'-CATAAGCCCATTCCATTAACCATC-3'  | PfrEBA165R25: 5'-TACCAAGTCCTTCCATGTCAGTA-3' |
| <b>p47</b>                 | Pfs47F449: 5'-GTAGATGTGATAATAGTAAAACGG-3'     | Pfs47D2F1: 5'-TATCCCAGGACAAGATAAAATAT-3'    |
|                            | Pfs47R1: 5'-AATGTATTGGAAAACATTCCATATAC-3'     | Pfs47R3: 5'-CAAGTTCATTCATATGYTAAMATACAT-3'  |
| <b>p48/45</b>              | P48/45F1: 5'-TGTAATTTTTCAAATGAAGGTGTTTC-3'    | P48/45F2: 5'-AGCCRGATAYGCGTGAACGTAGGTC-3'   |
|                            | P48/45R1: 5'-ATTTTATCATCTCCTTCARCATCTT-3'     | P48/45R2: 5'-TGGATGGTTCAAGTTCCTTCTGATTC-3'  |
| <b>RH5</b>                 | PfrRH5F5: 5'-CRAAGAATCAAGAAAATAATCTGAC-3'     | PfrRH5F6: 5'-TTGTTTATKCCTTCTCATAATKCTT-3'   |
|                            | PfrRH5R3: 5'-GATGSTTTGTYAATTAGRGATATGA-3'     | PfrRH5R4: 5'-CCATGTTTTGTCATTTCAATGYGTAAG-3' |
| <b>eba 175<sup>a</sup></b> | EBA175sf2: 5'-CATCTTGCTATGGGAAATGATATGG-3'    | EBA175sf3: 5'-GAAGGAATGTATTGATCCATGTATG-3'  |
|                            | EBA175sr2: 5'-TTRCTCAAATCATTCCAATAATCAG-3'    | EBA175sr3: 5'-TATATTCTATCAATGTTTCCAAGAC-3'  |

<sup>a</sup> See Supplementary Ref <sup>4</sup>.

## Supplementary References

1. Rask, T. S., Hansen, D. A., Theander, T. G., Gorm Pedersen, A. & Lavstsen, T. *Plasmodium falciparum* erythrocyte membrane protein 1; diversity in seven genomes – divide and conquer. *PLoS Comput. Biol.* **6**, e1000933 (2010).
2. Bull, P. C. *et al.* *Plasmodium falciparum* variant surface antigen expression patterns during malaria. *PLoS Pathog.* **1**, e26 (2005).
3. Liu, W. *et al.* African origin of the malaria parasite *Plasmodium vivax*. *Nature Comm.* **5**, 1–10 (2014).
4. Wanaguru, M., Liu, W., Hahn, B. H., Rayner, J. C., Wright, G. J., RH5-Basigin interaction plays a major role in the host tropism of *Plasmodium falciparum*. *Proc. Natl. Acad. Sci. USA*, **110**, (2013)
